# Supplementary material for: Inhibitory luminopsins: genetically-encoded bioluminescent opsins for versatile, scalable, and hardware-independent optogenetic inhibition
Source: PubMed Central journal article supplement (PMC4585826; doi:10.1038/srep14366), 2015-09-24
Supplement: srep14366-s1.pdf [file srep14366-s1.pdf]

## **Supplementary Information**

**Title:** Inhibitory luminopsins: genetically-encoded bioluminescent opsins for versatile, scalable, and hardware-independent optogenetic inhibition.

**Authors:** Jack K. Tung<sup>1,2</sup>, Claire-Anne Gutekunst<sup>2</sup>, \*Robert E. Gross<sup>1,2,3</sup>

<sup>1</sup>Coulter Department of Biomedical Engineering. Georgia Institute of Technology and Emory University. Atlanta, GA.

<sup>2</sup>Department of Neurosurgery. Emory University. Atlanta, GA.

<sup>3</sup>Department of Neurology. Emory University. Atlanta, GA

\*Corresponding author

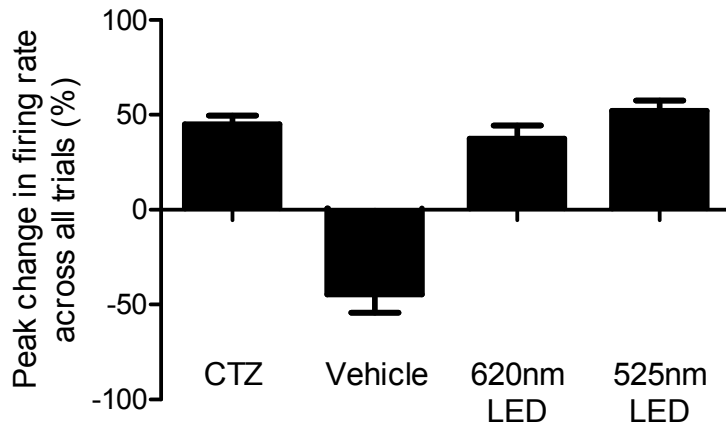

**Supplementary Figure 1:** Average peak change in single-unit firing rate across all trials of light stimulation, CTZ injections, and vehicle injections ( $n = 5$  trials each, 24 units across all trials) in the animal shown in Figure 4c-d.

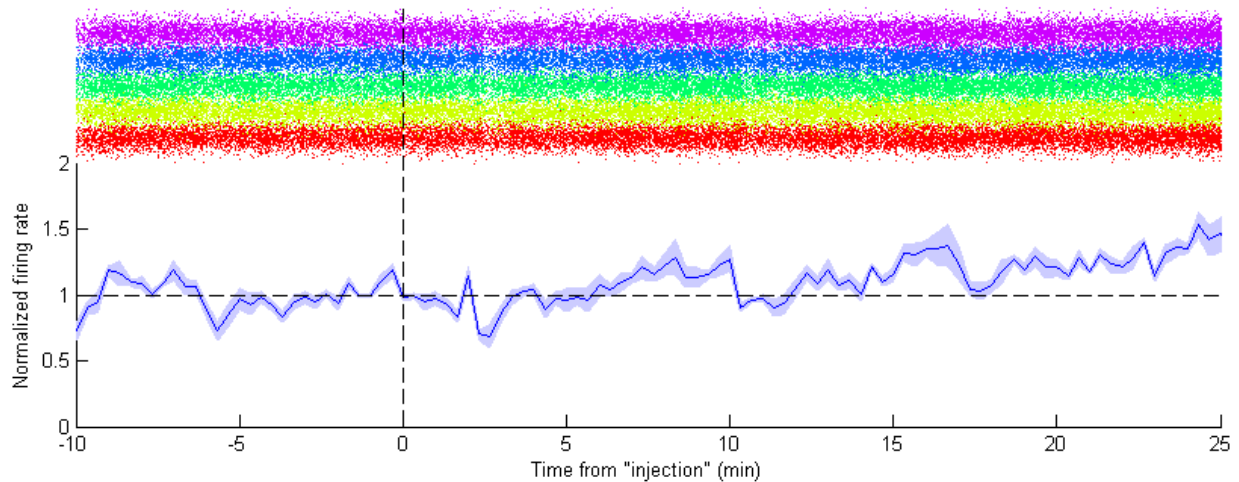

**Supplementary Figure 2: Hippocampal activity gradually increases under isoflurane anesthesia.** Normalized single-unit firing rate ( $n = 5$  units) over time for an animal on 1% isoflurane demonstrates a gradual increase in firing rate over time. Single-unit firing rate was similarly normalized to the median of a 10 minute baseline preceding an arbitrary “injection” time. SEM is shaded. Top: corresponding raster (each color corresponds to a different unit).
